# Supplementary material for: The Bamboo-Eating Giant Panda Harbors a Carnivore-Like Gut Microbiota, with Excessive Seasonal Variations
Source: PubMed Central journal article supplement — mBio. 2015 May 19;6(3):e00022-15. doi: 10.1128/mBio.00022-15 (PMC4442137; doi:10.1128/mbio.00022-15), 2015-05-19
Supplement: mbo002152285sf1.pdf [file mbo002152285sf1.pdf]

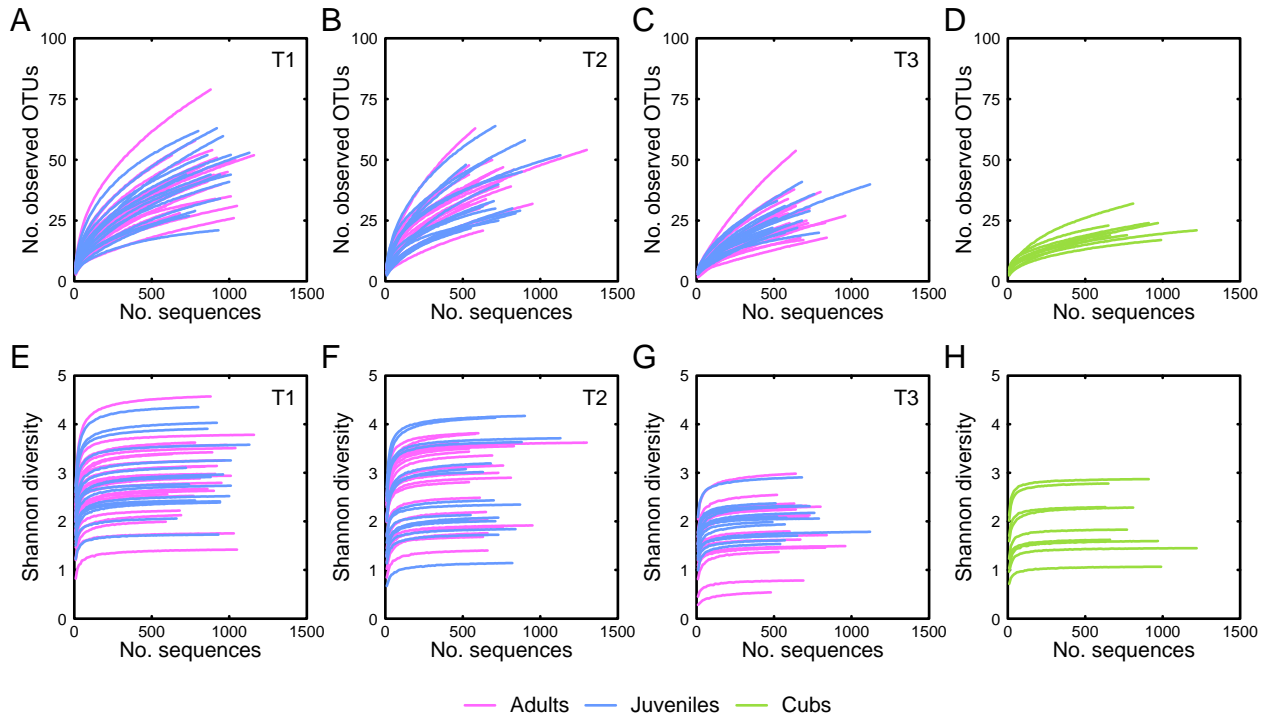

**Figure S1** OTU-level alpha diversity of the gut microbiota of the giant panda population. (A to D) Rarefaction curves of T1 (A), T2 (B), T3 (C) and cub samples (D), respectively. (E to H) Shannon diversity index curves of T1 (E), T2 (F), T3 (G) and cub samples (H), respectively.
