# Supplementary material for: The Bamboo-Eating Giant Panda Harbors a Carnivore-Like Gut Microbiota, with Excessive Seasonal Variations
Source: PubMed Central journal article supplement — mBio. 2015 May 19;6(3):e00022-15. doi: 10.1128/mBio.00022-15 (PMC4442137; doi:10.1128/mbio.00022-15), 2015-05-19
Supplement: mbo002152285sf2.pdf [file mbo002152285sf2.pdf]

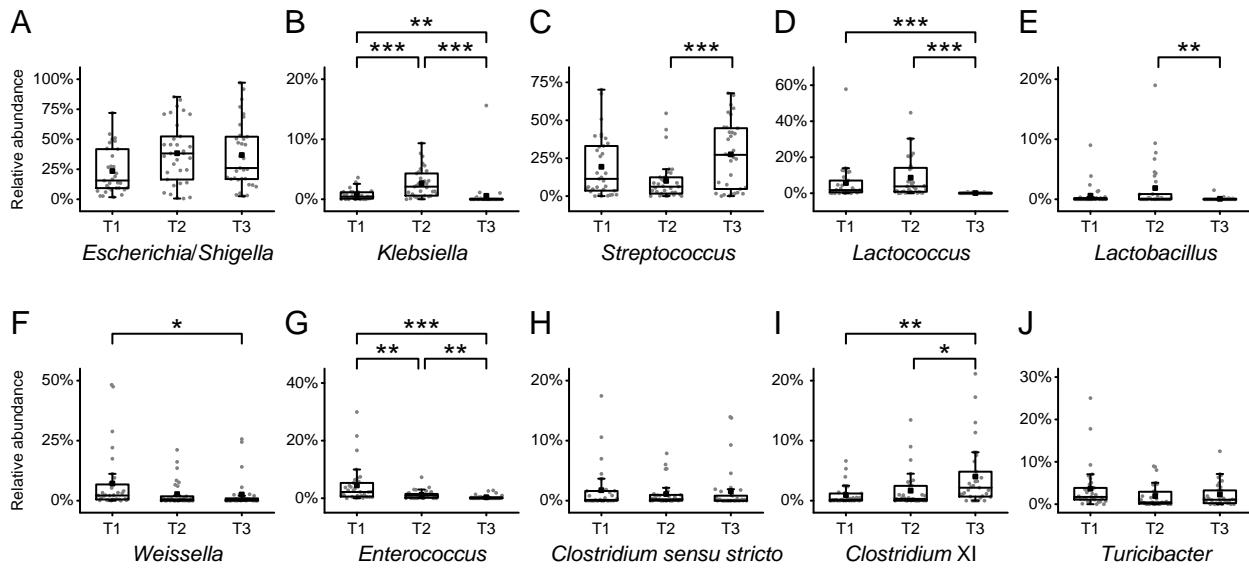

**Figure S2** Abundance variations in the ten dominant genera (>1% of total sequences), *Escherichia/Shigella* (A), *Klebsiella* (B), *Streptococcus* (C), *Lactococcus* (D), *Lactobacillus* (E), *Weissella* (F), *Enterococcus* (G), *Clostridium sensu stricto* (H), *Clostridium XI* (I) and *Turicibacter* (J) across seasons, compared by paired sample Wilcoxon signed rank test. \*  $P < 0.05$ , \*\*  $P < 0.01$ , \*\*\*  $P < 0.001$  (with Bonferroni post-hoc test). Only the 33 individuals that were sampled in all three seasons are included. See Figure 2 for definition of box and whisker plot.
