# Supplementary material for: The Bamboo-Eating Giant Panda Harbors a Carnivore-Like Gut Microbiota, with Excessive Seasonal Variations
Source: PubMed Central journal article supplement — mBio. 2015 May 19;6(3):e00022-15. doi: 10.1128/mBio.00022-15 (PMC4442137; doi:10.1128/mbio.00022-15), 2015-05-19
Supplement: mbo002152285sf4.pdf [file mbo002152285sf4.pdf]

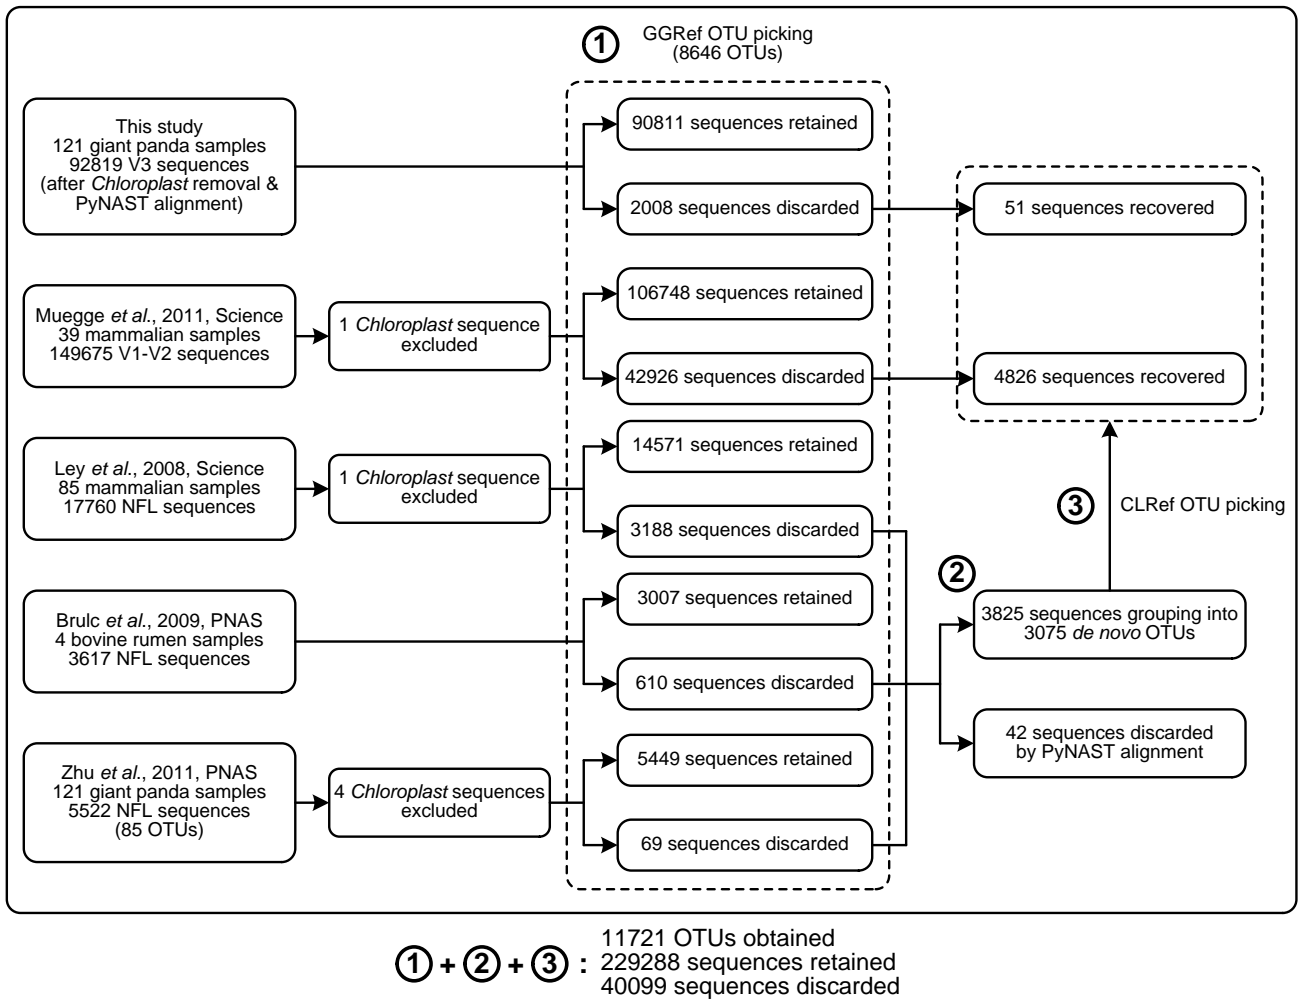

**Figure S4** The pipeline of the multi-step OTU picking procedure. GGRef denotes the reference-based OTU picking against the Greengenes reference database, whereas CLRef denotes the reference-based OTU picking against the 3,075 OTUs derived from the GGRef-discarded sequences from the three clone library datasets. NFL, near full-length.
