# Supplementary material for: The Bamboo-Eating Giant Panda Harbors a Carnivore-Like Gut Microbiota, with Excessive Seasonal Variations
Source: PubMed Central journal article supplement — mBio. 2015 May 19;6(3):e00022-15. doi: 10.1128/mBio.00022-15 (PMC4442137; doi:10.1128/mbio.00022-15), 2015-05-19
Supplement: mbo002152285sf5.pdf [file mbo002152285sf5.pdf]

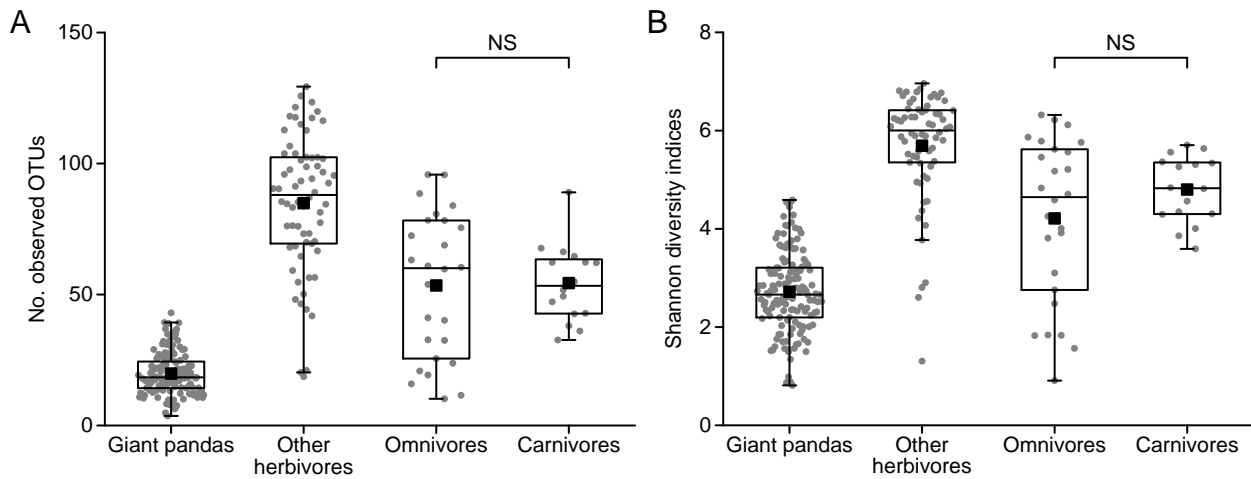

**Figure S5** The gut microbiota of the captive and wild giant pandas ( $n = 137$ ) had lower numbers of observed OTUs (A) and Shannon diversity indices (B) compared with other herbivores ( $n = 66$ ), omnivores ( $n = 26$ ) and carnivores ( $n = 16$ ) by Mann-Whitney test (with Bonferroni post-hoc test). See Figure 2 for definition of box and whisker plot. NS (not significant;  $P > 0.05$ ).
