# Supplementary material for: The Bamboo-Eating Giant Panda Harbors a Carnivore-Like Gut Microbiota, with Excessive Seasonal Variations
Source: PubMed Central journal article supplement — mBio. 2015 May 19;6(3):e00022-15. doi: 10.1128/mBio.00022-15 (PMC4442137; doi:10.1128/mbio.00022-15), 2015-05-19
Supplement: mbo002152285sf6.pdf [file mbo002152285sf6.pdf]

A

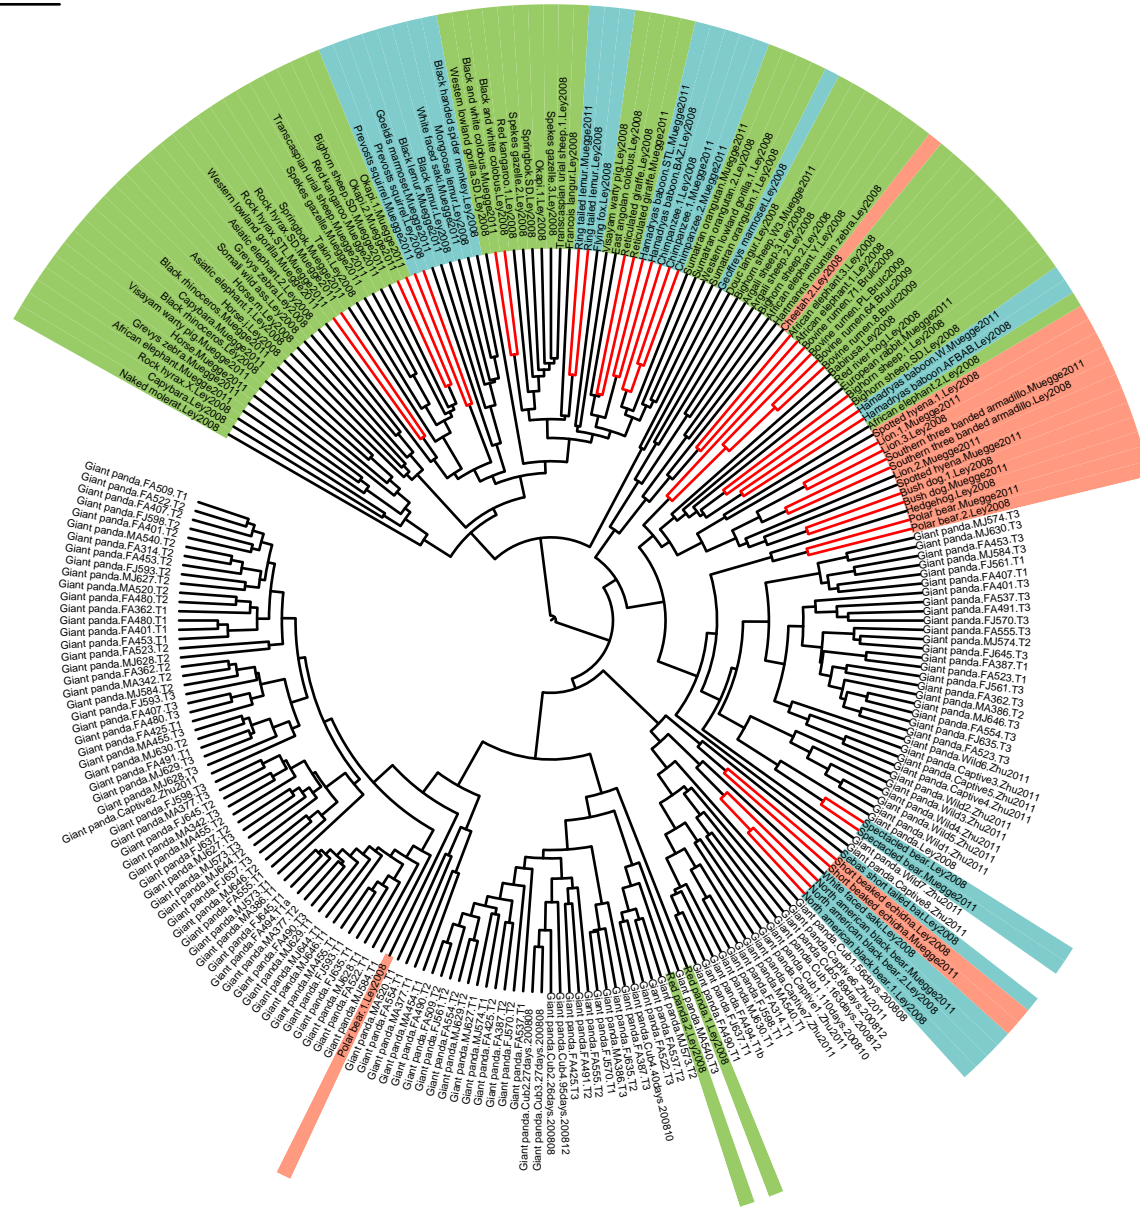

B

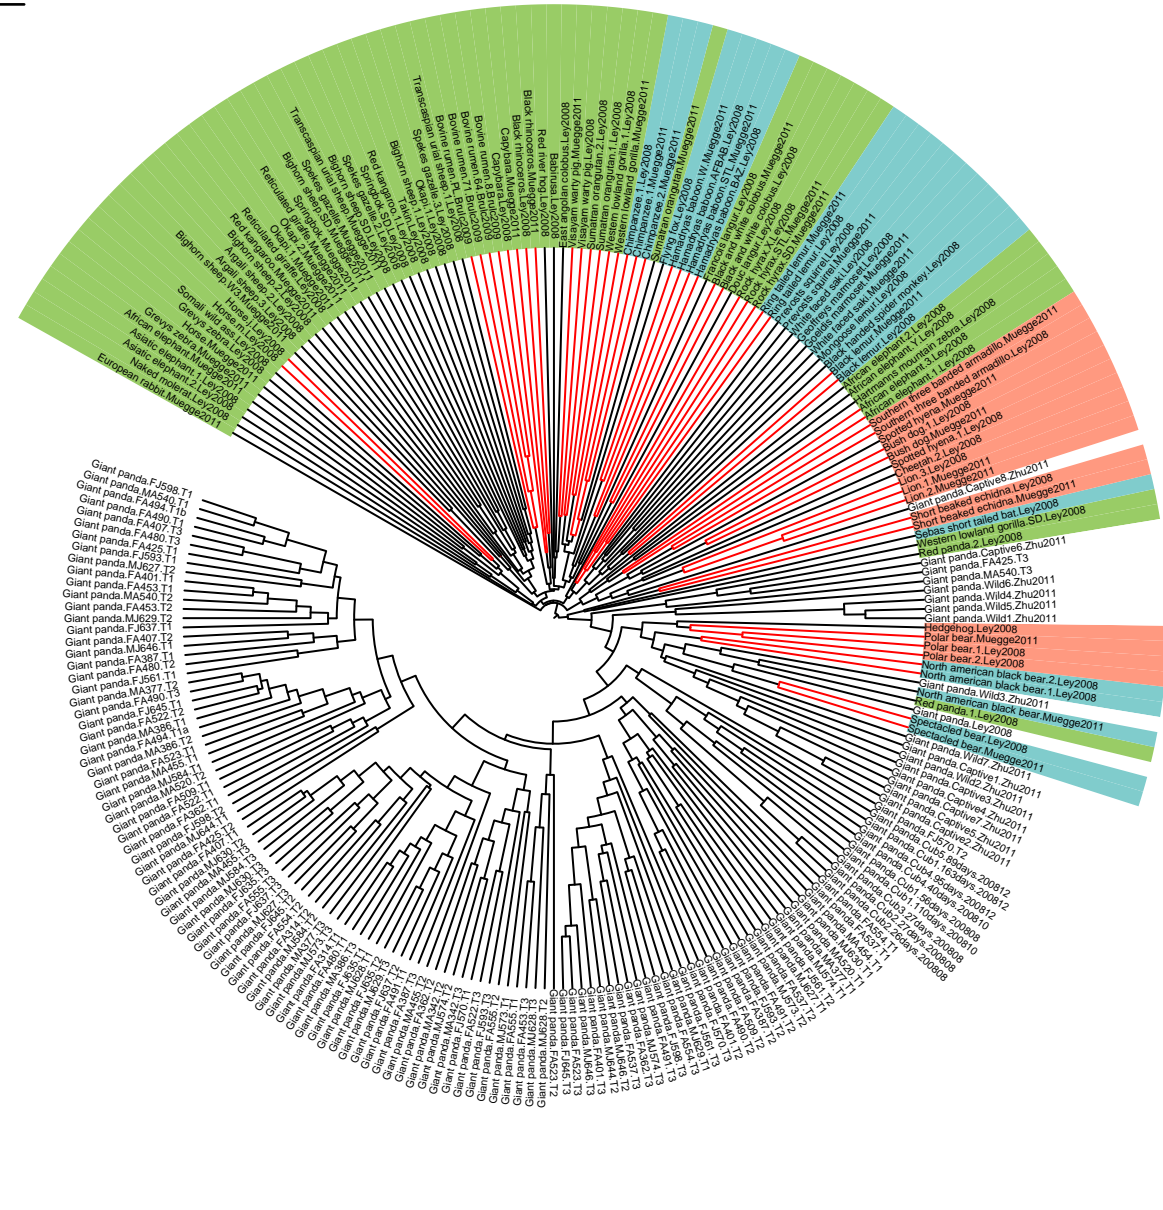

**Figure S6** UPGMA Hierarchical clustering analysis based on the weighted (A) and unweighted (B) UniFrac distance. The scale bar represents a distance of 0.1. Samples are color coded as described in Figure 4. Red clades indicate the samples of the same non-panda mammalian species from the published datasets that clustered together.
