# Supplementary material for: The Bamboo-Eating Giant Panda Harbors a Carnivore-Like Gut Microbiota, with Excessive Seasonal Variations
Source: PubMed Central journal article supplement — mBio. 2015 May 19;6(3):e00022-15. doi: 10.1128/mBio.00022-15 (PMC4442137; doi:10.1128/mbio.00022-15), 2015-05-19
Supplement: mbo002152285sf7.pdf [file mbo002152285sf7.pdf]

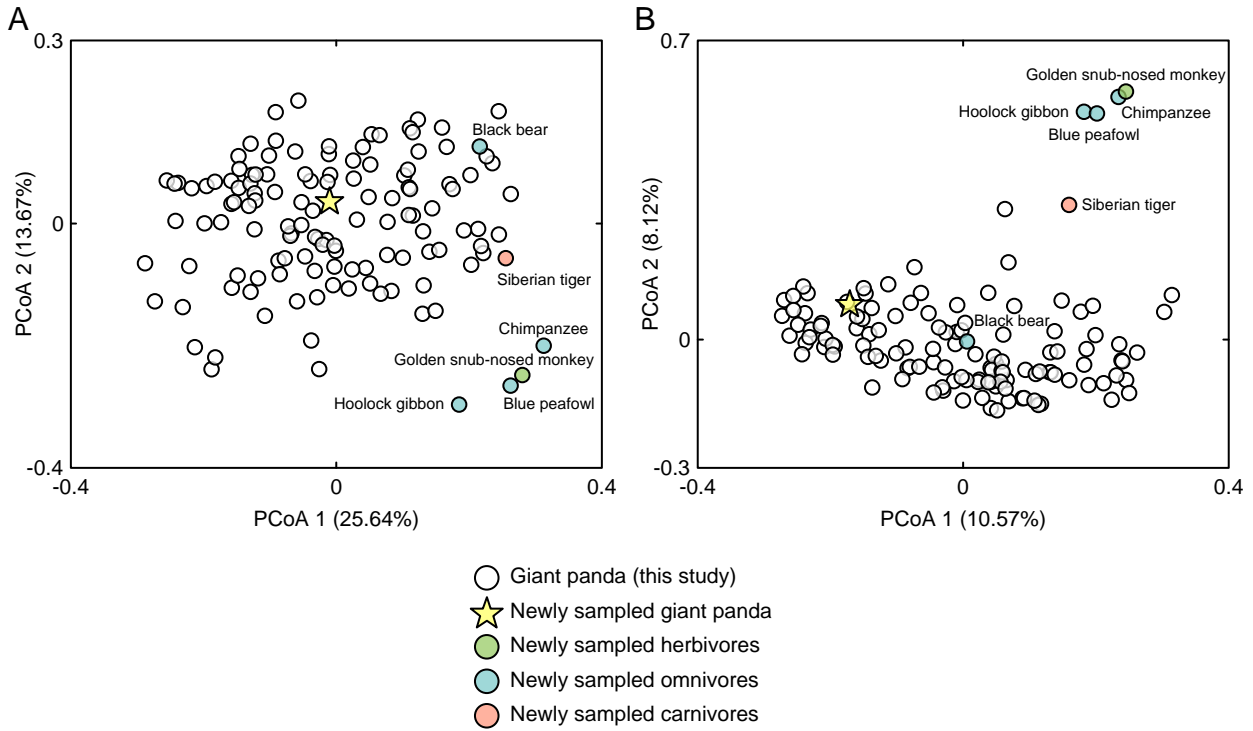

**Figure S7** Comparison of gut microbiota structure of the giant panda population described in this study with that of the newly sampled herbivores, omnivores, and carnivores. PCoA score plots based on the weighted (A) and unweighted (B) UniFrac distances are shown.
